# Supplementary material for: Hierarchical TiO2 spheres decorated with Au nanoparticles for visible light hydrogen production
Source: Royal Society of Chemistry journal article supplement (doi:10.1039/c4ra15818k), 2015-01-01
Supplement: c4ra15818k1.pdf [file c4ra15818k1.pdf]

Supporting information for

## **Hierarchical TiO<sub>2</sub> spheres decorated with Au nanoparticles for visible light hydrogen production**

Guoqiang Zhang,<sup>ab</sup> Zhao Zhao,<sup>ab</sup> Huaqiao Tan,<sup>a</sup> Haifeng Zhao,<sup>a</sup> Dan Qu,<sup>ab</sup> Min Zheng,<sup>a</sup> Weixing Yu<sup>c</sup> and Zaicheng Sun<sup>c\*</sup>

<sup>a</sup> State Key Laboratory of Luminescence and Applications, Changchun Institute of Optics, Fine Mechanics and Physics, Changchun, 130033, Jilin, P. R. China. Email: sunzc@ciomp.ac.cn

<sup>b</sup> University of Chinese Academy of Sciences, Beijing, P. R. China.

<sup>c</sup> Insititue of Micro and Nano Optics, College of Optoelectronic Engineering, Shenzhen University, Shenzhen 518060, China

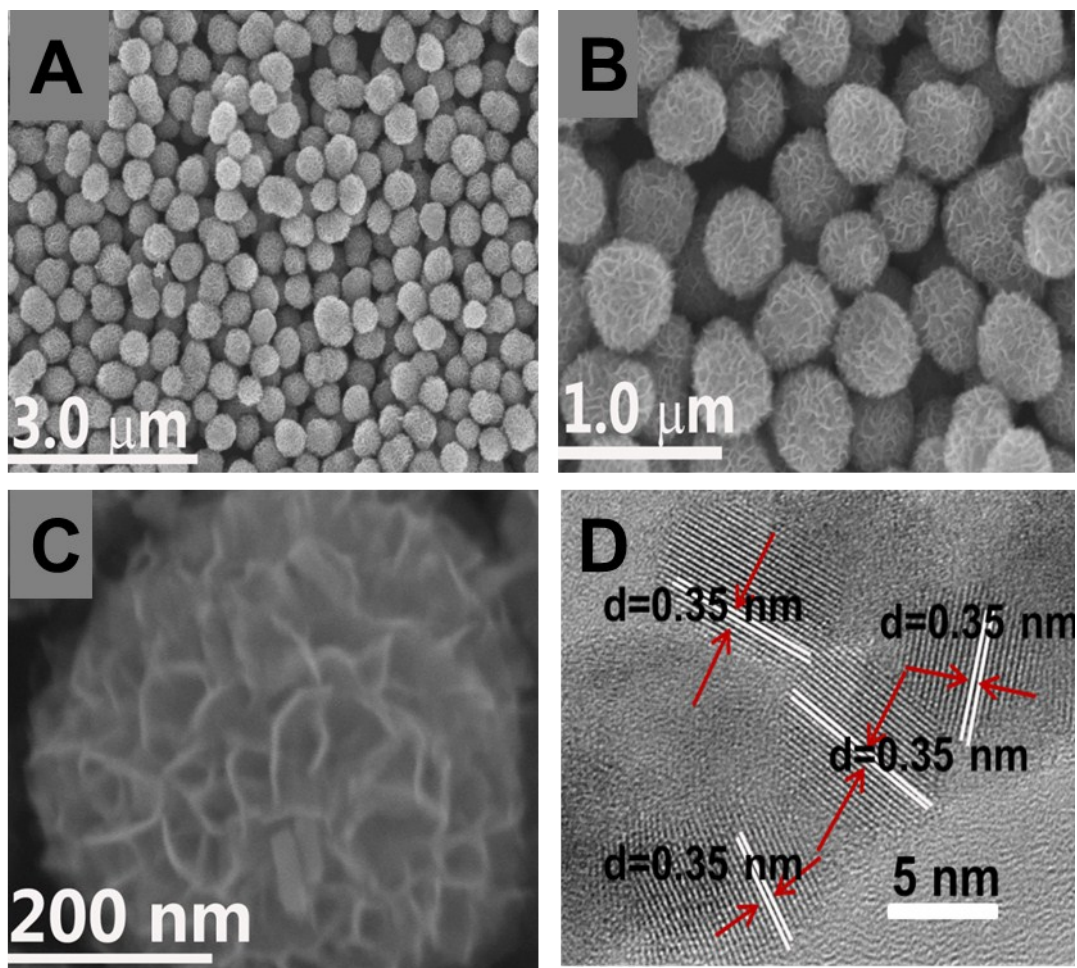

**Figure S1.** Scanning electron microscopy (SEM, A-C) and high resolution TEM (D) images of as-prepared TiO<sub>2</sub> sphere.

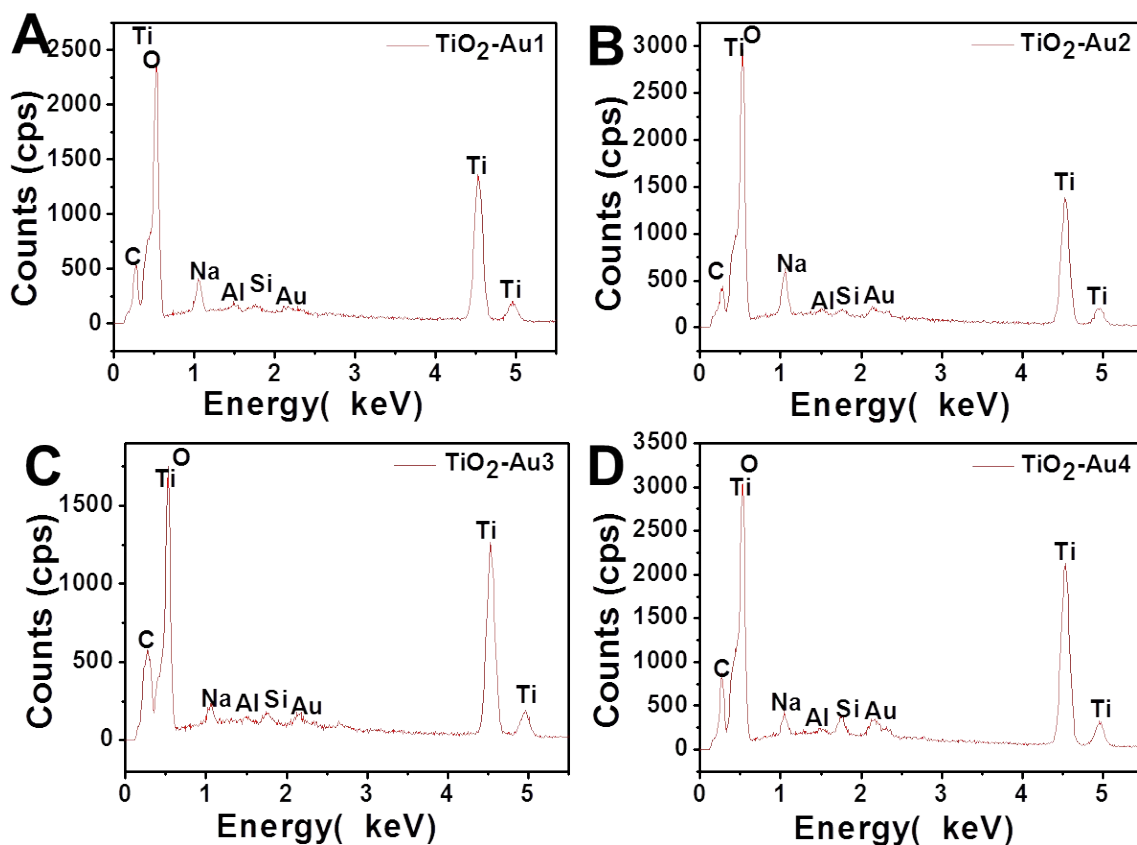

Figure S2. energy dispersive x-ray analysis (EDAX) spectra of  $\text{TiO}_2\text{-Au1-4}$  for A-D, respectively.

| <i>Element</i> | <i>Wt %</i> | <i>At %</i> |
|----------------|-------------|-------------|
| <i>O K</i>     | 35.01       | 62.02       |
| <i>AuM</i>     | 01.07       | 00.15       |
| <i>TiK</i>     | 63.92       | 37.83       |

**$\text{TiO}_2\text{-Au1}$**

| <i>Element</i> | <i>Wt %</i> | <i>At %</i> |
|----------------|-------------|-------------|
| <i>O K</i>     | 38.44       | 65.71       |
| <i>AuM</i>     | 02.00       | 00.28       |
| <i>TiK</i>     | 59.56       | 34.01       |

**$\text{TiO}_2\text{-Au2}$**

| <i>Element</i> | <i>Wt %</i> | <i>At %</i> |
|----------------|-------------|-------------|
| <i>O K</i>     | 30.23       | 57.12       |
| <i>AuM</i>     | 02.43       | 00.37       |
| <i>TiK</i>     | 67.34       | 42.50       |

**$\text{TiO}_2\text{-Au3}$**

| <i>Element</i> | <i>Wt %</i> | <i>At %</i> |
|----------------|-------------|-------------|
| <i>O K</i>     | 31.25       | 58.41       |
| <i>AuM</i>     | 02.82       | 00.43       |
| <i>TiK</i>     | 65.93       | 41.16       |

**$\text{TiO}_2\text{-Au4}$**

Figure S3. Element amount analysis of  $\text{TiO}_2\text{-Au1-4}$  calculated from EDAX spectra.

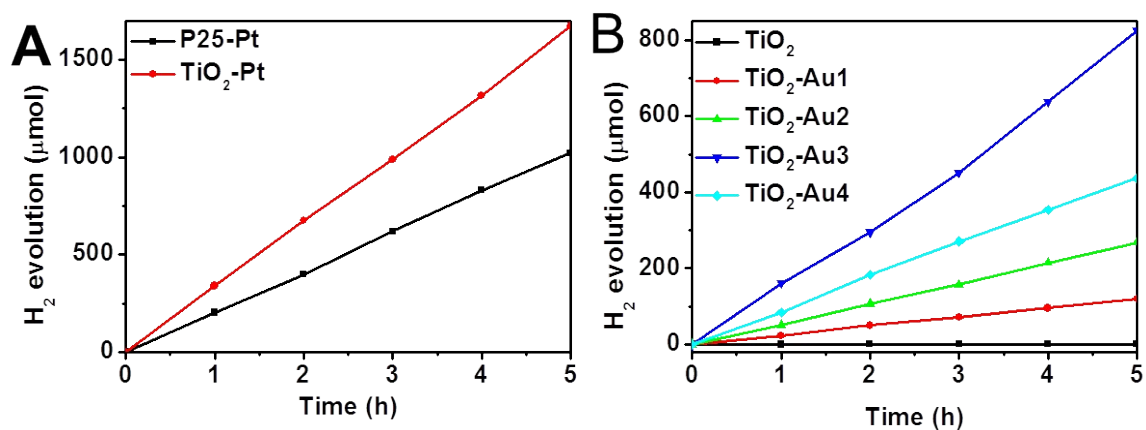

**Figure S4.** H<sub>2</sub> production relationship with time for P25 TiO<sub>2</sub> and TiO<sub>2</sub> spheres (A) and TiO<sub>2</sub> spheres loaded with different amount Au nanoparticles (B) under 300W Xe lamp without any filter.

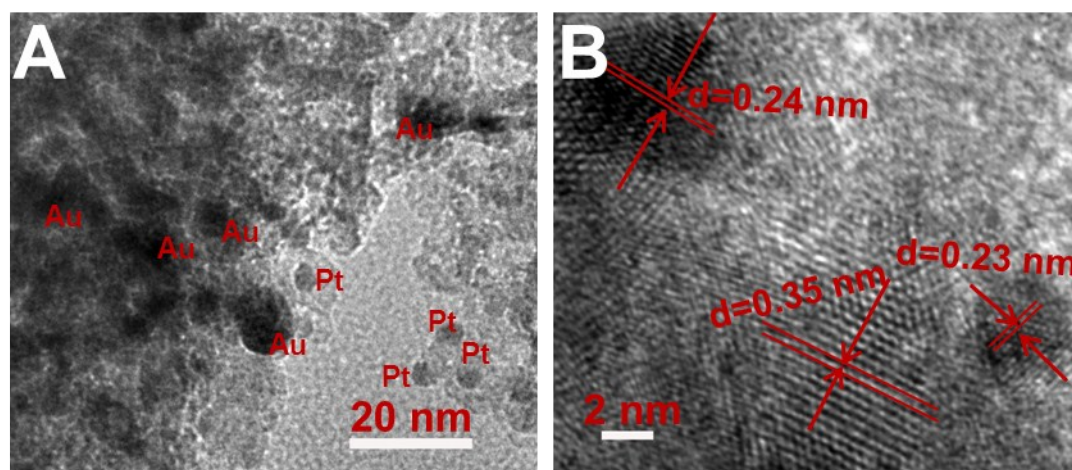

**Figure S5.** TEM (A) and high resolution TEM (B) images of TiO<sub>2</sub>-Au<sub>3</sub> photocatalyst loaded with 1.0 wt% Pt.
